# Cortical atrophy mediates the accumulating effects of vascular risk factors on cognitive decline in the Alzheimer's disease spectrum

Qing Wang<sup>1</sup>, Cancan He<sup>1</sup>, Yao Zhu<sup>1</sup>, Qianqian Zhang<sup>1</sup>, Zhijun Zhang<sup>1,2</sup>, Chunming Xie<sup>1,2</sup>, on behalf of Alzheimer's disease Neuroimaging Initiative\*

<sup>1</sup>Department of Neurology, Affiliated ZhongDa Hospital, School of Medicine, Southeast University, Nanjing 210009, Jiangsu, China

<sup>2</sup>Neuropsychiatric Institute, Affiliated Southeast University, Nanjing 210009, Jiangsu, China

\*The data used in this article were obtained from the Alzheimer's disease Neuroimaging Initiative (ADNI) database (<http://adni.loni.usc.edu/>). As such, investigators within the ADNI contributed to the design and implementation of the ADNI and/or provided data but did not participate in the analysis or writing of this report. The following listing provides the ADNI investigators: [http://adni.loni.usc.edu/wp-content/uploads/how\\_to\\_apply/ADNI\\_Acknowledgement\\_List.pdf](http://adni.loni.usc.edu/wp-content/uploads/how_to_apply/ADNI_Acknowledgement_List.pdf)

**Correspondence to:** Chunming Xie; email: [chmxie@163.com](mailto:chmxie@163.com)

**Keywords:** Alzheimer's disease, vascular risk factors, cortical atrophy, MRI, mediation analysis

**Received:** January 13, 2020

**Accepted:** June 13, 2020

**Published:** July 29, 2020

**Copyright:** Wang et al. This is an open-access article distributed under the terms of the Creative Commons Attribution License (CC BY 3.0), which permits unrestricted use, distribution, and reproduction in any medium, provided the original author and source are credited.

## ABSTRACT

There are increasing concerns regarding the association of vascular risk factors (VRFs) and cognitive decline in the Alzheimer's disease (AD) spectrum. Currently, we investigated whether the accumulating effects of VRFs influenced gray matter volumes and subsequently led to cognitive decline in the AD spectrum. Mediation analysis was used to explore the association among VRFs, cortical atrophy, and cognition in the AD spectrum. **123** AD spectrum were recruited and VRF scores were constructed. Multivariate linear regression analysis revealed that higher VRF scores were correlated with lower Mini-Mental State Examination scores and higher Alzheimer's Disease Assessment Scale-Cognitive Subscale scores, indicating higher VRF scores lead to severer cognitive decline in the AD spectrum. In addition, subjects with higher VRF scores suffered severe cortical atrophy, especially in medial prefrontal cortex and medial temporal lobe. More importantly, common circuits of VRFs- and cognitive decline associated with gray matter atrophy were identified. Further, using mediation analysis, we demonstrated that cortical atrophy regions significantly mediated the relationship between VRF scores and cognitive decline in the AD spectrum. These findings highlight the importance of accumulating risk in the vascular contribution to AD spectrum, and targeting VRFs may provide new strategies for the therapeutic and prevention of AD.

## INTRODUCTION

Alzheimer's disease (AD), the leading cause of neurodegenerative dementia associated with aging, affects over 50 million individuals worldwide and is predicted to increase to 152 million individuals affected by 2050 [1]. Currently, there are no effective treatments to stop the progression of AD [2]. Therefore, reducing the risk of developing AD has increased the importance

of early prevention of AD. Currently, there are increasing concerns regarding the association of vascular risk factors (VRFs) and cognitive decline in the AD spectrum since the vascular hypothesis of AD was first proposed in 1993 [3–8]. Recent reports indicated that VRFs, such as diabetes, hypertension, and current smoking, have been associated with increased risk of AD [9, 10]. It was estimated that one third of all AD cases worldwide might be attributable to potentially

modifiable risk factors [11], while a 10%-25% reduction in all diabetes, midlife hypertension, mid-life obesity, smoking, depression, low educational attainment and physical inactivity risk factors could potentially prevent as many as 1.1-3.0 million cases worldwide [12]. Recent evidence from systematic review and meta-analyses suggests that antihypertensive use may lower the incidence of dementia and AD [1], and from randomized controlled trials suggest that rosiglitazone may reduce the risk of AD in patients with diabetes [13]. So public health interventions targeted at vascular risk factors will probably achieve the greatest reduction in the prevalence of AD. Recent studies showed that a cumulative number of VRFs were significantly associated with elevated brain amyloid in midlife or healthy aging [5, 14], which is a core feature of AD pathology [11, 15]. Neuroimaging studies have also found that VRFs were associated with structural disturbances in the brain, which were significantly associated with declined memory and executive function in late life [3, 16, 17], suggesting that VRFs could accelerate brain structural aging in midlife and that the vascular burden contributes to the progression of cognitive impairment to dementia. For example, structural atrophy in the posterior cingulate cortex (PCC), middle temporal structures, and entorhinal cortices has been observed in type 2 diabetes mellitus patients [18, 19]. Hypertension could increase the risk of dementia and contribute to the atrophy of the prefrontal-temporal cortex and hippocampus, which are involved in cognitive and executive function [20–22]. Decreased gray matter volumes (GMVs) were also found in the insula, parahippocampus, and amygdala in smokers compared to nonsmokers [23, 24]. Furthermore, increasing evidence has identified an association between obesity and decreased functional connectivity within networks that comprise the medial prefrontal cortex and default mode network (DMN) in healthy adults [25], while a higher educational level could decrease the risk of dementia compared with those with fewer years of formal education [4]. In addition, depression, as a severe form of psychological distress, has been associated with subcortical and hippocampal neuronal loss [26] and accompanies cognitive impairment in old adults [27]. Recently, the aggregating effects of VRFs on cerebrovascular changes have attracted more attention in AD and mild cognitive impairment (MCI) patients [28, 29]. Preliminary findings have shown that the cumulative effects of VRFs significantly enhance the cortical thinness in MCI patients and accelerated the disruption of GMVs in community-populations across middle and older age [30]. Taken together, these findings directly support the vascular hypothesis of AD and indicate the VRFs may speed up disturbances of brain structural and functional integration in the AD spectrum.

Although substantial evidence indicates a single VRF contributes to AD pathophysiology and dementia, there have been limited data to date examining the summative effects of VRFs that affect cognitive performance in the AD spectrum. Currently, we hypothesize that the VRFs burden accelerates brain structure aging in the AD spectrum and that cortical atrophy can mediate the effects of VRFs on cognitive decline. Therefore, the purpose of this study was to investigate whether the accumulating effects of VRFs contribute to gray matter atrophy and subsequently lead to cognitive decline as well as to examine the mediation effect of cortical atrophy that links the VRFs and cognitive decline in the AD spectrum.

## RESULTS

### Participant characteristics

The demographic information and clinical evaluations are shown in Table 1. No significant differences were identified for gender and age among the four groups. Notably, the apolipoprotein E (APOE)  $\epsilon 4$  carrying status and Mini-Mental State Examination (MMSE) and Alzheimer's Disease Assessment Scale-Cognitive Subscale (ADAS-Cog) scores were significantly different (Table 1). Post-hoc analysis further indicated the source of the differences (Bonferroni correction,  $p < 0.05/3 = 0.017$ ) and identified more APOE $\epsilon 4$  carriers and more severe cognitive impairment (lower MMSE and higher ADAS-Cog scores) in the AD group than in the other three groups. In addition, we also found that there was significantly increase of the VRF scores in the AD spectrum.

### Group-level comparison of VRFs and behavioral significance

As shown in Figure 1, we observed that the VRF scores were significantly increased with disease severity in the AD spectrum. Importantly, the VRF scores were negatively correlated with the MMSE scores and positively correlated with the ADAS-Cog scores, after controlling for the effects of age, gender and GMV in the AD spectrum.

### Effects of VRFs on GMV across all subjects

Voxel-wise multivariate linear regression analysis identified the neural basis of VRFs on GMV across all subjects. Briefly, the VRF scores were negatively correlated with the GMV in the left postcentral gyrus (LPoCG), left cuneus (LCUN), and left fusiform face area (LFFA) and right ventromedial prefrontal cortex (RvmPFC), right middle cingulate cortex (RMCC), and right cuneus (RCUN), as shown in Figure 2A.

**Table 1. Participant characteristics.**

| Category           | CN<br>(n=69) | EMCI<br>(n=52)          | LMCI<br>(n=41)          | AD<br>(n=30)           | p value |
|--------------------|--------------|-------------------------|-------------------------|------------------------|---------|
| Age                | 73.6±5.9     | 71.2±6.7                | 71.5±8.1                | 73.1±6.8               | 0.462*  |
| Gender(F/M)        | 40/29        | 31/21                   | 17/24                   | 15/15                  | 0.312†  |
| APOE (ε4≥1 allele) | 21           | 26 <sup>a</sup>         | 17 <sup>d</sup>         | 22 <sup>c</sup>        | 0.001†  |
| MMSE               | 28.8±1.3     | 28.2±1.8 <sup>e</sup>   | 27.7±1.6 <sup>b,d</sup> | 22.5±2.5 <sup>c</sup>  | <0.001* |
| ADAS-Cog           | 9.1±4.0      | 12.6±5.4 <sup>a,e</sup> | 16.9±6.7 <sup>b,d</sup> | 34.4±10.5 <sup>c</sup> | <0.001* |
| VRF scores         | 1.1±1.1      | 1.4±1.2 <sup>e</sup>    | 1.4±1.5 <sup>d</sup>    | 2.1±1.7 <sup>c</sup>   | 0.004*  |

Note: \*, *P* values were obtained using one-way ANOVA; †, *P* values were obtained by Chi-square test; unless otherwise indicated, data are presented as mean± standard deviation. Post-hoc analysis was used Bonferroni correction method; a represents statistical difference between the CN group and the EMCI group; b represents statistical difference between the CN group and the LMCI group; c represents statistical difference between the CN group and the AD group; d represents statistical difference between the AD group and the LMCI group; e represents statistical difference between the AD group and the EMCI group. **Abbreviations:** CN, cognitively normal; EMCI, early mild cognitive impairment; LMCI, late mild cognitive impairment; AD, Alzheimer’s disease; F/M, female/male; APOE, apolipoprotein E; MMSE, mini-mental state examination; ADAS-Cog, Alzheimer’s disease assessment scale-Cognitive section; VRF, vascular risk factor.

Numerical representations of the significant effects of VRFs on the regions of the LPoCG, LFFA, RvmPFC, and RMCC are also shown in Figure 2B. In addition, the neural effects of a single VRF on GMV were also identified and described in Supplementary Figure 1.

### Group-level comparison of GMV and behavioral significance

Similarly, analysis of the voxel-wise, group-level significant difference of GMV and a post-hoc analysis were performed to detect the source of the difference in the AD spectrum. We also identified the atrophy pattern

in the early mild cognitive impairment (EMCI), late mild cognitive impairment (LMCI) and AD patients compared to the cognitively normal (CN) subjects. Moreover, the neural substrates of the MMSE and ADAS-Cog on the whole-brain GMV were identified in the AD spectrum, and the detailed information is illustrated in Supplementary Figures 2–4.

### Common circuits of the VRFs and cognitive performance on GMV across all subjects

As shown in Figure 3A, the common regions involved in the neural basis of the MMSE and the accumulating



**Figure 1. Group-level comparison of VRF scores in the AD spectrum population and its behavioral significance.** A: The results illustrated that there was a significant increase in the VRF scores in the AD spectrum ( $F_{(3, 188)}= 4.53$ ,  $p=0.004$ ). B and C: VRF scores were significantly correlated with cognitive impairment severity, which was measured by the MMSE and ADAS-Cog scores, after controlling for the effects of age, gender and gray matter volumes. This finding directly indicates that a higher VRF scores is associated with a greater severity of cognitive impairment. Abbreviations: VRF, vascular risk factor; CN, cognitively normal; EMCI, early mild cognitive impairment; LMCI, late mild cognitive impairment; AD, Alzheimer’s disease; MMSE, Mini-Mental State Examination; ADAS-Cog, Alzheimer’s Disease Assessment Scale-Cognitive Subscale; VRF, vascular risk factor.

effects of VRFs on the whole brain GMV were identified. These regions included the left superior parietal cortex (LSPC), left postcentral gyrus (LPoCG), left inferior parietal cortex (LIPC), left precuneus (LPCUN), LFFA, RvmPFC, and right fusiform face area (RFFA). Interestingly, we also found the common regions involved in the neural structures of the ADAS-cog and the accumulating effects of VRFs on the whole brain GMV in the AD spectrum, including the LIPC, LPCUN, left temporoparietal junction (LTPJ), LFFA, RvmPFC, and RMCC, as shown in Figure 3C. In addition, representative illustrations of the relationship among the VRFs, GMV, and MMSE scores or ADAS-Cog scores in the overlapped regions are presented in Figure 3B and Figure 3D.

### Mediating effects of cortical atrophy on the relationship between VRFs and cognitive performance

The simple mediator model of the effect of VRFs on cognitive function was employed, and cortical atrophy regions were entered into the model as candidate mediators. We used the overlapped brain areas previously described as region of interest (ROI) for the mediation analysis. Cortical atrophy was shown to partly mediate the effect of VRFs on cognitive performance. Given this finding, the 95% CI for the path  $a*b$  did not cross zero, and the indirect effect of

VRFs on cognitive performance through the ROI was considered significant (Figure 4).

### Hypothesis that the neural mechanism of VRFs affects GMV in the AD spectrum

Given the accumulating effects of VRFs and individual VRFs on accelerating cortical atrophy and integrating the findings of previous studies, a system model underlying the neurobiological mechanism was proposed and might, at least in part, reflect the relationship among VRFs, cortical atrophy, and cognitive decline in the AD spectrum, as shown in Supplementary Figure 5. This model indicates that a single VRF acts on the cognitive normal brain, followed by a chronic neuroinflammatory reaction in the brain. Subsequently, chronic neuroinflammation continually dysregulates amyloid precursor protein processing, thus promoting  $\beta$ -amyloid ( $A\beta$ ) plaque formation and the hyperphosphorylation of tau protein (two key features of AD pathology) in the cerebral cortex. This increased burden on the cerebral cortex may trigger downstream cellular and molecular events associated with AD, leading to inefficient synaptic communication and, eventually, accelerating brain atrophy. With the accumulation and propagation of chronic neuroinflammatory reactions in the brain, the decreased cognitive function of individuals also progresses from a



**Figure 2. Multivariate regression analysis indicates the effects of VRFs on gray matter volume across all subjects.** (A) Brain regions representing the significant effects of VRFs on GMV after controlling for the effects of covariates, including age, gender, APOE $\epsilon$ 4 genotype, and group. The blue color indicates a negative correlation between VRF scores and GMV. The color bar is presented with z scores. (B) Representative illustration of the significant effects of VRFs on regions of the LPoCG, LFFA, RvmPFC and RMCC. Abbreviations: VRFs, vascular risk factors; LPoCG, left postcentral gyrus; CUN, cuneus; LFFA, left fusiform face area; RvmPFC, right ventromedial prefrontal cortex; RMCC, right middle cingulate cortex; GMV, gray matter volume; CN, cognitively normal; EMCI, early mild cognitive impairment; LMCI, late mild cognitive impairment; AD, Alzheimer's disease; APOE, apolipoprotein E.

mild cognitive impairment to a complete loss of the ability of to live and even to dementia.

## DISCUSSION

We demonstrated the accumulating effects and individualized contributions of VRFs to the cortical

atrophy and, importantly, the cortical atrophy mediating the relationship between VRFs and cognitive performance in the AD spectrum. These findings strongly suggest that the VRFs burden may exacerbate subtle cognitive decline associated with cortical atrophy and indicate that the increased risk for cognitive decline in individuals with elevated VRFs may be driven by



**Figure 3. Overlapping regions from the effects of VRFs on GMV and the correlates of cognitive performance influenced by GMV.** (A) Mapping the overlapping regions from the accumulating effects of VRFs on GMV and the neural correlates of the MMSE on GMV in the AD spectrum. (B) Representative illustration of the relationship among the VRF scores, GMV, and MMSE scores in the overlapped regions. The results indicate that higher VRF scores are associated with more GM atrophy (red lines) and a lower MMSE performance (blue lines). (C) Mapping the overlapped regions from the accumulating effects of VRFs on GMV and the neural correlates of the ADAS-Cog on GMV in the AD spectrum. (D) Representative illustration of the relationship among the VRF scores, GMV, and ADAS-Cog scores in the overlapped regions. The results indicate that higher VRF scores are associated with more GM atrophy (red lines) and a higher ADAS-Cog performance (blue lines). Abbreviations: LSPC, left superior parietal cortex; LPOCG, left postcentral gyrus; LIPC, left inferior parietal cortex; LPCUN, left precuneus; LFFA, left fusiform face area; RvmPFC, right ventromedial prefrontal cortex; RFFA, right fusiform face area; LTPJ, left temporoparietal junction; RMCC, right middle cingulate cortex; MMSE, Mini-Mental State Examination; ADAS-Cog, Alzheimer's Disease Assessment Scale-Cognitive Subscale; GMV, gray matter volume; VRF scores, vascular risk factor scores.

cortical atrophy [3]. Those indicate that identifying people with high VRF scores and intervening against these risk factors might be the key to prevent the occurrence of AD. Previous data from several retrospective studies have found declining dementia prevalence or incidence rates in specific population cohorts since the 1970s [31–34], especially, in those studies with the large improvements in educational attainment (including higher rates of graduation from high school and college attendance) [32–34]. Recent evidences have shown that antihypertensive, rosiglitazone and formal education are beneficial for reducing an individual’s risk for cognitive decline and dementia [1, 13, 35]. Other studies have also noted that substantial improvements in management of VRFs such as smoking and obesity, could decline the prevalence or incidence of dementia [36, 37]. Thus, targeting VRFs may provide a novel disease-modifying strategy to prevent or delay the progression of AD.

Although increasing evidence has indicated that VRFs are associated with cognitive impairment [38], most studies tend to focus on the VRFs individually, while multiple VRFs often coexist in reality. Currently, we

investigated how the six common VRFs jointly affected gray matter atrophy and cognitive decline in the AD spectrum; we identified that the accumulating effects of six VRFs were associated with cognitive decline and might occur via accelerating the cortical atrophy, particularly in the prefrontal cortex and parietal-temporal system. Previous studies have reported that exposure to VRFs could accelerate structural brain aging, including hippocampal and temporal lobe atrophy, and cognitive decline in midlife, even in the absence of cerebrovascular disease [39]. Structural changes in these brain regions closely related to AD were also identified in nondemented adults with VRFs [40, 41]. Evidence has shown that hypertension, diabetes and obesity were independently and negatively associated with overlapping gray matter regions, including the posterior cingulate cortex, which overlapped with regions that are known to show atrophy in AD [42]. The negative associations of VRFs with spatial memory were associated with mediation through differences in posterior cingulate cortex volume [42]. Several studies on the cerebral structure of patients with diabetes have evidenced increased cortical and subcortical atrophy, which were associated with impaired cognitive



**Figure 4. Cortical atrophy mediates the association between VRFs and cognitive function in the AD spectrum population. (A)** Mediation effect of cortical atrophy linking the VRFs and MMSE in AD spectrum population. **(B)** Mediation effect of cortical atrophy linking the VRFs and ADAS-Cog in the AD spectrum population. All of the mediation effects and significance are computed by bootstrap sampling with 10,000 iterations. Effect sizes and 95% confidence intervals are displayed for each ROI. Abbreviations: LSPC, left superior parietal cortex; LPCoCG, left postcentral gyrus; LIPC, left inferior parietal cortex; LPCUN, left precuneus; LFFA, left fusiform face area; RvmPFC, right ventromedial prefrontal cortex; RFFA, right fusiform face area; LTPJ, left temporoparietal junction; RMCC, right middle cingulate cortex; MMSE, Mini-Mental State Examination; ADAS-Cog, Alzheimer’s Disease Assessment Scale-Cognitive Subscale; GMV, gray matter volume; VRF scores, vascular risk factor scores; ROI, region of interest; a, slope of VRF→ atrophy; b, slope of atrophy→ MMSE or ADAS-Cog; c’, slope of VRF→ MMSE or ADAS-Cog; a\*b, the strength of the mediation pathway.

performance [43, 44]. Recent study has also shown that depression was associated with progressive atrophy of frontal cortex and anterior cingulate cortex and contributed to more rapid conversion to dementia in MCI [45]. Moreover, increased hypertension was strongly associated with elevated A $\beta$  deposition in healthy aging with at least 1 APOE  $\epsilon$ 4 allele [14] and AD patients [46] and, together with obesity, could moderate the relationship between A $\beta$  deposition and cognitive decline even in midlife [47]. These findings indicate that VRFs may impact brain structural atrophy before a disease process is evident and facilitate the process of AD through an amyloid-dependent pathway. More importantly, we also identified the individualized contribution of each VRF to the cortical atrophy in the AD spectrum and indicated that distinct brain structural atrophy patterns in different stages of the AD spectrum are attributed to specific VRFs. These findings provide direct evidence to support the view that specific neural systems are differently vulnerable to the VRFs burden in this disease. From this point, our results extended previous studies that a higher VRFs burden was associated with an increased rate of progression of global brain atrophy, particularly in the medial temporal lobe, hippocampal atrophy, and cognitive decline [3, 48, 49].

It is intriguing that common brain regions involved in the VRFs and cognitive performance were identified in the AD spectrum, which are primarily located in the vmPFC and posterior parietal-temporal cortex. Accumulating evidence has frequently indicated that these brain regions were closely associated with abnormal A $\beta$  deposition in AD patients [50], which indicates that structural overlap between VRF-impacted regions and AD-related structural changes within parietal-temporal and frontal areas may lead to an enhanced vulnerability of these regions in individuals with both conditions. More importantly, we identified that cortical atrophy in these regions could mediate the potential effects of VRFs on the cognitive decline in the AD spectrum. Previous studies have reported that these regions, as a distinctive subsystem of the DMN, present with a unique characteristic of functional-anatomic connectivity, cognitive associations, and responses to AD pathophysiology [51, 52]. Furthermore, as proposed by the cascading network failure in the AD spectrum, the failure initially starts in the posterior DMN, particularly in the posterior parietal-temporal cortex, and then transfers the processing burden to other subsystems of the DMN [51, 53]. Importantly, these overlapped regions, as the core components of the posterior DMN, were preferentially targeted by the A $\beta$  deposition before measurable amyloid plaques [51]. These findings suggest that VRFs may synergistically act with AD pathology on cognitive decline and jointly accelerate the progression to AD.

The exact cause of high VRFs accelerating cognitive decline in adults is unknown and will require further investigation. As proposed by the two-hit vascular hypothesis, VRFs initially lead to vascular dysfunction, reduce the cerebral blood flow, disrupt the oxygenic supply and nutrients to brain tissues, and subsequently contribute to brain atrophy [54]. Moreover, VRF-related vascular dysfunction directly leads to increased productions and decreased clearance of A $\beta$ . Multiple molecular mechanisms, such as oxidative stress, altered endothelial function, inflammation, impaired endothelial progenitor cell function, increased brain blood barrier permeability, and less clearance of beta-amyloid were involved in the process of higher risk factors promoting cognitive impairment and dementia [55]. Also, increasing insulin resistance, hyperinsulinemia and endothelial dysfunction in diabetes were associated with more hippocampal and amygdala neuronal loss and atrophy, which ultimately led to memory decline [43, 56]. In addition, it has been suggested that changes in the serotonergic system driven by neurodegeneration in adjacent cholinergic system may induce depression and accelerate cognitive impairment [57]. These processes significantly increase the risk of AD onset and progression [58]. Another hypothesis is that VRFs may induce a chronic neuroinflammation reaction of the brain, which subsequently contributes to brain structural atrophy by releasing immune mediators [59]. Accumulating evidence has suggested that chronic neuroinflammation is increasingly emerging as an important pathological factor in the development and progression of AD [60–66]. According to this theory, it is apparent that abnormal A $\beta$  deposition can activate microglia and astrocytes, trigger an innate immune response and subsequently release inflammatory mediators, which contribute to disease development and progression. Based on these findings, we proposed a system model centered on the neuroinflammation-related mechanisms of how VRFs contribute to brain structural changes and, ultimately, result in AD. In this model, the VRFs jointly or individually affect the neurovascular unit, are likely to interfere with immunological processes of the brain, and further promote cortical atrophy and cognitive impairment. The modulation of these VRFs and targeting the immune mechanisms could provide new insights for future therapeutic or preventive strategies for AD.

There were several limitations in our study. First, our study was a cross-sectional study, and it was not possible to observe the longitudinal cognitive changes in each group. Second, previous research has shown that higher levels of VRFs were associated with poorer brain health among white matter macrostructure and

microstructure damage [67], currently, we did not strictly control the effects of VRFs on the white matter changes in the AD spectrum. Third, other factors, such as hyperlipidemia, might contribute to AD pathophysiology and should be investigated in the future study. In addition, a small sample size was recruited in the current study, which may limit the generalizability of these findings. To overcome these limitations, a community-based, clinical cohort project should be performed and more subjects recruited to validate our results in follow-up studies.

The present study demonstrates the accumulating effects of VRFs on cortical atrophy and cognitive decline and shows that cortical atrophy can mediate the relationship between VRFs and cognitive performance in the AD spectrum. These findings expand our understanding of how VRFs affect brain structure changes and subsequently lead to cognitive decline and highlight that targeting VRFs may provide new strategies for the early detection, treatment and prevention of AD.

## MATERIALS AND METHODS

### The Alzheimer's disease Neuroimaging Initiative data set

The data used in this article were obtained from the public Alzheimer's disease Neuroimaging Initiative (ADNI) database (<https://ida.loni.usc.edu>). The ADNI was launched by the National Institute on Aging, the National Institute of Biomedical Imaging and Bioengineering, the Food and Drug Administration, private pharmaceutical companies and nonprofit organizations in 2003. The goal of the ADNI is to investigate whether the combination of neuroimaging, biological markers and clinical and neuropsychological assessments can accurately detect the disease progression in MCI and AD [68]. Ethical approval was obtained by the ADNI investigators ([http://www.adni-info.org/pdfs/adni\\_protocol\\_9\\_19\\_08.pdf](http://www.adni-info.org/pdfs/adni_protocol_9_19_08.pdf)). All Institutional Review Boards of all participating sites at their respective institutions approved the study. All ADNI participants provided written informed consent before the start of the study.

### Participants

Subjects were selected in the present study according to the following criteria: Caucasian, availability of 3D T1-weighted MRI scan demographic information, MMSE and ADAS-Cog score. Full inclusion/exclusion criteria are described in detail at <http://www.adni-info.org/>. Briefly, all subjects were between the ages of 55 and 90 years, were fluent in Spanish or English, and were free of any other significant neurologic diseases. LMCI participants had a subjective memory complaint, a

Clinical Dementia Rating (CDR) of 0.5, and were classified as single- or multi- domain amnesic; EMCI group differed from LMCI only based on education-adjusted scores for the delayed paragraph recall subscore on the Wechsler Memory Scale–Revised Logical Memory II such that EMCI subjects were intermediate between normal subjects and LMCI. CN subjects had CDR scores of 0, and patients with AD met standard diagnostic criteria. According to our criteria, 192 participants, including 69 CN, 52 patients with EMCI, 41 patients with LMCI, and 30 patients with AD, were entered into the analysis.

### Vascular risk factor assessment

VRFs were evaluated at all in-person visits. This study focuses on six modifiable risk factors: diabetes (self-reported diabetes, use of antidiabetic therapy, or casual blood glucose  $\geq 200$  mg/dl), hypertension (untreated systolic blood pressure  $\geq 140$  mmHg, untreated diastolic blood pressure  $\geq 90$  mmHg, or use of antihypertensive medications), smoking (self-report at least 20 cigarettes/day), depression (lifetime prevalence of major depressive disorder using the Diagnostic and Statistical Manual of Mental Disorders or International Classification of Diseases criteria), low education attainment (the proportion of adults with an International Standard Classification of Education 15 level of 2 or less (pre-primary, primary, and lower secondary education)), and obesity (adult prevalence of body-mass index greater than 30 kg/m<sup>2</sup>).

To evaluate the summative effect of all VRFs, we used composite risk scores based on the summation of the individual relative risk value of each VRF [11]. Specifically, each of the indicated VRFs was assigned a 0 if absent or 1 if present based on the previously described criteria. The distinctive relative risk value of each VRF was then selected from the publication [11] and multiplied by the original value (0 or 1) to obtain the individual VRF scores. Finally, we summed these six VRFs to create a composite score for each participant.

### MRI data acquisition

High-resolution 3D T1-weighted MR images were acquired on a 3.0T GE scanner using the ADNI-1 (8-channel coil, TR = 650 ms, TE = min full, flip-angle = 8°, slice thickness = 1.2 mm, resolution = 256 × 256 mm and FOV = 26 cm) and ADNI-GO/ ADNI-2 (8-channel coil, TR = 400 ms, TE = min full, flip-angle = 11°, slice thickness = 1.2 mm, resolution = 256 × 256 mm and FOV = 26 cm). Both ADNI-1 and ADNI-GO/ ADNI-2 MRI data were acquired in the sagittal plane using an IR-FSPGR pulse sequence. Details about the ADNI MRI data acquisition protocol are available at the link <http://adni.loni.usc.edu/methods/documents/mri-protocols/>.

## Structural image analysis

Structural image analysis was carried out using VBM8 toolbox in Statistical Parametric Mapping (SPM8, <http://www.fil.ion.ucl.ac.uk/spm/>). The detailed procedure was as follows. First, all structural images were corrected for bias and segmented into gray matter (GM), white matter (WM) and cerebrospinal fluid (CSF) by a unified segmentation model [69]. The segmented images were then registered in brain templates by diffeomorphic anatomical registration using the exponential lie algebra (DARTEL) method [70]. Furthermore, the resulting images were normalized to the Montreal Neurological Institute (MNI) space. During the normalization step, the image intensity was modulated to preserve the original brain volumes. Finally, the modulated volumes were resampled to  $2 \times 2 \times 2 \text{ mm}^3$  and smoothed with an isotropic Gaussian kernel of 6 mm full width at half maximum (FWHM).

## Statistical analysis

### *Demographic and neuropsychiatric characteristic analyses*

One-way analysis of variance (ANOVA) and chi-square tests (only for the gender and APOE $\epsilon$ 4 gene frequency) were used to compare the demographic and cognitive performance data among the groups using SPSS 23.0 (<https://www.ibm.com/support/home/>). The statistical threshold was set at a  $p < 0.05$ .

### *Group-level comparison of VRF scores and behavioral significance in the AD spectrum*

One-way ANOVA was used to compare VRF scores differences in the disease spectrum. Partial correlation analysis was subsequently performed to test the relationship between the VRF scores and cognitive performance (MMSE and ADAS-Cog scores) in the AD spectrum ( $p < 0.05$ ), after controlling for the covariates of age, gender, APOE $\epsilon$ 4 genotype, and total gray matter volume.

### *Neural effects of VRF scores on GMV in the AD spectrum*

Similarly, multivariate linear regression analysis was also performed to investigate the neural basis of VRFs on GMV in the AD spectrum (3dClustSim correction,  $p < 0.01$ , cluster size  $>1120 \text{ mm}^3$ ):

$$GM_i = \beta_0 + \beta_1 VRF + \beta_2 Age + \beta_3 Gen + \beta_4 Edu + \beta_5 APOE + \xi \quad [1]$$

where  $GM_i$  is the GM volume value of the  $i$ th voxel across group subjects and  $\beta_0$  is the intercept of straight line fitting in the model.  $\beta_1$  is the effect of the VRF scores on the GMV of the  $i$ th voxel.  $\beta_2$ ,  $\beta_3$ ,  $\beta_4$ , and  $\beta_5$

are the effects of age, gender and APOE $\epsilon$ 4 genotype among the four groups, respectively, as covariates of no interest in the linear regression model.

In addition, multivariate linear regression analysis was used to analyze the potential effects of a single VRF on GMV in the AD spectrum.

### *Group-level differences of GMV in the AD spectrum*

Imaging data analysis was performed using the Analysis of Functional NeuroImages (AFNI) software (<http://afni.nimh.nih.gov/afni>). A voxel-wise analysis of covariance (ANCOVA) with age, sex and APOE $\epsilon$ 4 genotype as covariates of no interest was performed to determine the significant group differences of GMV among CN, EMCI, LMCI and AD. For multiple comparison correction, the latest version of the 3dClustSim program implemented in AFNI was used to control the false-positive rate (corrected  $p < 0.005$ ,  $\alpha=0.05$ , and cluster size= $675 \text{ mm}^3$ ). We subsequently extracted the GMV values of each region for a post-hoc analysis to determine the source of significance from the ANCOVA among the four groups.

### *Relationship between cognitive performance and GMV in the AD spectrum*

To investigate the neural substrates that underlie the functions of the MMSE and ADAS-Cog on the whole brain GMV, a multivariate linear regression analysis was employed (3dClustSim correction,  $p < 0.01$ , and cluster size  $>1120 \text{ mm}^3$ ) [71, 72].

$$GM_i = \beta_0 + \beta_1 MMSE + \beta_2 Age + \beta_3 Gen + \beta_4 Edu + \beta_5 APOE + \xi \quad [2]$$

$$GM_i = \beta_0 + \beta_1 ADAS-Cog + \beta_2 Age + \beta_3 Gen + \beta_4 Edu + \beta_5 APOE + \xi \quad [3]$$

where  $GM_i$  is the GMV value of the  $i$ th voxel across group subjects and  $\beta_0$  is the intercept of straight line fitting in the model.  $\beta_1$  is the effect of MMSE or ADAS-Cog scores on the GMV of the  $i$ th voxel, respectively.  $\beta_2$ ,  $\beta_3$ ,  $\beta_4$ , and  $\beta_5$  are the effects of age, gender and APOE $\epsilon$ 4 genotype among the four groups, as covariance of no interest in the linear regression model.

### *Overlapping regions from the effects of VRFs on GMV and influence of GMV on cognitive performance in the AD spectrum*

A conjunction analysis (the neural effects of VRFs on GMV overlapped with the neural substrates of the MMSE or ADAS-Cog on GMV) was then separately performed to identify the overlapping regions that were involved in the neural basis of VRFs and MMSE or VRFs and ADAS-cog.

## Mediation analysis

Given the significant association of VRF scores and cognitive performance on the severity of cortical atrophy observed in the AD spectrum, we performed a mediation analysis to determine whether cortical atrophy mediates the relationship between VRF scores and cognitive decline in the AD spectrum. The classic mediation model was selected, and the Sobel test was used to confirm the significance of the mediator if the weighted coefficient (a or b) was not significant [73, 74].

Three step regression models were constructed and are shown as follows:

$$Y = cX + e1 \quad (4)$$

$$M = aX + e2 \quad (5)$$

$$Y = c'X + bM + e3 \quad (6)$$

where X is the independent variable (VRF), Y is the dependent variable (cognitive performance), M is the mediator (cortical atrophy), a is the regression coefficient for the relationship between VRFs and cortical atrophy strength (GMV, same below) in regions of interest, b is the regression coefficient for the relationship between cortical atrophy strength in regions of interest and cognitive performance, c is the regression coefficient for the relationship between VRFs on cognitive performance, and c' represents the effect of VRFs on cognitive performance while controlling for the indirect effect. We used the Bootstrap method to implement these steps [75]. The Bootstrapped iteration process with 10,000 samples produced robust Bootstrapped Standard Errors (Boot SE) and 95% Confidence Intervals (CI) for the mediation effects. The significance of the indirect effects (a\*b) was confirmed when 95% CIs were bound between (0 to +1) or (0 to -1) excluding zero.

## AUTHOR CONTRIBUTIONS

All authors have made substantial intellectual contributions to this manuscript in one or more of the following areas: design or conceptualization of the study, analysis or interpretation of the data, or drafting or revision of the manuscript. Dr. Xie and Prof. Zhang design this study, Ms. Wang and Dr. He conducted the statistical analysis. Dr. Xie guide to do data analysis. Thanks to Dr. Zhu and Dr. Zhang for their help at the data preparation of the study. All authors have given final approval of this manuscript.

## CONFLICTS OF INTEREST

The authors declare no potential conflicts of interest.

## FUNDING

Funding for this study was provided by the National Key Projects for Research and Development Program of China [2016YFC1305800, 2016YFC1305802, CMX], the National Natural Science Foundation of China [81671256, 81871069, CMX], the Key Project for Research and Development Program of Jiangsu Province [BE2018741, BE2015715], and the Nanjing International Joint Research and Development Project [201715013]. Those institutions had no further role in study design; in the collection, analysis and interpretation of data; in the writing of the report; and in the decision to submit the paper for publication.

## REFERENCES

1. Larsson SC, Markus HS. Does treating vascular risk factors prevent dementia and alzheimer's disease? a systematic review and meta-analysis. *J Alzheimers Dis.* 2018; 64:657–68.  
<https://doi.org/10.3233/JAD-180288>  
PMID:[29914039](https://pubmed.ncbi.nlm.nih.gov/29914039/)
2. O'Brien JT, Burns A, and BAP Dementia Consensus Group. Clinical practice with anti-dementia drugs: a revised (second) consensus statement from the british association for psychopharmacology. *J Psychopharmacol.* 2011; 25:997–1019.  
<https://doi.org/10.1177/0269881110387547>  
PMID:[21088041](https://pubmed.ncbi.nlm.nih.gov/21088041/)
3. Lee WJ, Liao YC, Wang YF, Lin YS, Wang SJ, Fuh JL. Summative Effects of Vascular Risk Factors on the Progression of Alzheimer Disease. *J Am Geriatr Soc.* 2020; 68:129–136.  
<https://doi.org/10.1111/jgs.16181>  
PMID:[31587263](https://pubmed.ncbi.nlm.nih.gov/31587263/)
4. Baumgart M, Snyder HM, Carrillo MC, Fazio S, Kim H, Johns H. Summary of the evidence on modifiable risk factors for cognitive decline and dementia: a population-based perspective. *Alzheimers Dement.* 2015; 11:718–26.  
<https://doi.org/10.1016/j.jalz.2015.05.016>  
PMID:[26045020](https://pubmed.ncbi.nlm.nih.gov/26045020/)
5. Gottesman RF, Schneider AL, Zhou Y, Coresh J, Green E, Gupta N, Knopman DS, Mintz A, Rahmim A, Sharrett AR, Wagenknecht LE, Wong DF, Mosley TH. Association between midlife vascular risk factors and estimated brain amyloid deposition. *JAMA.* 2017; 317:1443–50.  
<https://doi.org/10.1001/jama.2017.3090>  
PMID:[28399252](https://pubmed.ncbi.nlm.nih.gov/28399252/)
6. Gustafson D, Rothenberg E, Blennow K, Steen B, Skoog I. An 18-year follow-up of overweight and

- risk of alzheimer disease. Arch Intern Med. 2003; 163:1524–28.  
<https://doi.org/10.1001/archinte.163.13.1524>  
PMID:12860573
7. Kivipelto M, Ngandu T, Laatikainen T, Winblad B, Soininen H, Tuomilehto J. Risk score for the prediction of dementia risk in 20 years among middle aged people: a longitudinal, population-based study. Lancet Neurol. 2006; 5:735–41.  
[https://doi.org/10.1016/S1474-4422\(06\)70537-3](https://doi.org/10.1016/S1474-4422(06)70537-3)  
PMID:16914401
  8. de la Torre JC, Mussivand T. Can disturbed brain microcirculation cause alzheimer's disease? Neurol Res. 1993; 15:146–53.  
<https://doi.org/10.1080/01616412.1993.11740127>  
PMID:8103579
  9. Daviglus ML, Plassman BL, Pirzada A, Bell CC, Bowen PE, Burke JR, Connolly ES Jr, Dunbar-Jacob JM, Granieri EC, McGarry K, Patel D, Trevisan M, Williams JW Jr. Risk factors and preventive interventions for alzheimer disease: state of the science. Arch Neurol. 2011; 68:1185–90.  
<https://doi.org/10.1001/archneurol.2011.100>  
PMID:21555601
  10. Takeda S. Progression of alzheimer's disease, tau propagation, and its modifiable risk factors. Neurosci Res. 2019; 141:36–42.  
<https://doi.org/10.1016/j.neures.2018.08.005>  
PMID:30120962
  11. Norton S, Matthews FE, Barnes DE, Yaffe K, Brayne C. Potential for primary prevention of alzheimer's disease: an analysis of population-based data. Lancet Neurol. 2014; 13:788–94.  
[https://doi.org/10.1016/S1474-4422\(14\)70136-X](https://doi.org/10.1016/S1474-4422(14)70136-X)  
PMID:25030513
  12. Barnes DE, Yaffe K. The projected effect of risk factor reduction on alzheimer's disease prevalence. Lancet Neurol. 2011; 10:819–28.  
[https://doi.org/10.1016/S1474-4422\(11\)70072-2](https://doi.org/10.1016/S1474-4422(11)70072-2)  
PMID:21775213
  13. Akimoto H, Negishi A, Oshima S, Wakiyama H, Okita M, Horii N, Inoue N, Ohshima S, Kobayashi D. Antidiabetic drugs for the risk of alzheimer disease in patients with type 2 DM using FAERS. Am J Alzheimers Dis Other Demen. 2020; 35:1533317519899546.  
<https://doi.org/10.1177/1533317519899546>  
PMID:32162525
  14. Rodrigue KM, Rieck JR, Kennedy KM, Devous MD Sr, Diaz-Arrastia R, Park DC. Risk factors for  $\beta$ -amyloid deposition in healthy aging: vascular and genetic effects. JAMA Neurol. 2013; 70:600–06.  
<https://doi.org/10.1001/jamaneurol.2013.1342>  
PMID:23553344
  15. Lee DH, Lee P, Seo SW, Roh JH, Oh M, Oh JS, Oh SJ, Kim JS, Jeong Y. Neural substrates of cognitive reserve in alzheimer's disease spectrum and normal aging. Neuroimage. 2019; 186:690–702.  
<https://doi.org/10.1016/j.neuroimage.2018.11.053>  
PMID:30503934
  16. Clerici F, Caracciolo B, Cova I, Fusari Imperatori S, Maggiore L, Galimberti D, Scarpini E, Mariani C, Fratiglioni L. Does vascular burden contribute to the progression of mild cognitive impairment to dementia? Dement Geriatr Cogn Disord. 2012; 34:235–43.  
<https://doi.org/10.1159/000343776>  
PMID:23147614
  17. Knopman DS, Gottesman RF, Sharrett AR, Tapia AL, DavisThomas S, Windham BG, Coker L, Schneider AL, Alonso A, Coresh J, Albert MS, Mosley TH Jr. Midlife vascular risk factors and midlife cognitive status in relation to prevalence of mild cognitive impairment and dementia in later life: the atherosclerosis risk in communities study. Alzheimers Dement. 2018; 14:1406–15.  
<https://doi.org/10.1016/j.jalz.2018.03.011>  
PMID:29763593
  18. Brundel M, van den Heuvel M, de Bresser J, Kappelle LJ, Biessels GJ, and Utrecht Diabetic Encephalopathy Study Group. Cerebral cortical thickness in patients with type 2 diabetes. J Neurol Sci. 2010; 299:126–30.  
<https://doi.org/10.1016/j.jns.2010.08.048>  
PMID:20869085
  19. Chen Z, Sun J, Yang Y, Lou X, Wang Y, Wang Y, Ma L. Cortical thinning in type 2 diabetes mellitus and recovering effects of insulin therapy. J Clin Neurosci. 2015; 22:275–79.  
<https://doi.org/10.1016/j.jocn.2014.07.014>  
PMID:25439756
  20. den Heijer T, Launer LJ, Prins ND, van Dijk EJ, Vermeer SE, Hofman A, Koudstaal PJ, Breteler MM. Association between blood pressure, white matter lesions, and atrophy of the medial temporal lobe. Neurology. 2005; 64:263–67.  
<https://doi.org/10.1212/01.WNL.0000149641.55751.2E>  
PMID:15668423
  21. Leritz EC, Salat DH, Williams VJ, Schnyer DM, Rudolph JL, Lipsitz L, Fischl B, McGlinchey RE, Milberg WP. Thickness of the human cerebral cortex is associated with metrics of cerebrovascular health in a normative sample of community dwelling older adults. Neuroimage. 2011; 54:2659–71.  
<https://doi.org/10.1016/j.neuroimage.2010.10.050>  
PMID:21035552
  22. Williamson JD, Pajewski NM, Auchus AP, Bryan RN, Chelune G, Cheung AK, Cleveland ML, Coker LH, Crowe MG, Cushman WC, Cutler JA, Davatzikos C, Desiderio L,

- et al, and SPRINT MIND Investigators for the SPRINT Research Group. Effect of intensive vs standard blood pressure control on probable dementia: a randomized clinical trial. *JAMA*. 2019; 321:553–61.  
<https://doi.org/10.1001/jama.2018.21442>  
PMID:30688979
23. Hanlon CA, Owens MM, Joseph JE, Zhu X, George MS, Brady KT, Hartwell KJ. Lower subcortical gray matter volume in both younger smokers and established smokers relative to non-smokers. *Addict Biol*. 2016; 21:185–95.  
<https://doi.org/10.1111/adb.12171>  
PMID:25125263
24. Fritz HC, Wittfeld K, Schmidt CO, Domin M, Grabe HJ, Hegenscheid K, Hosten N, Lotze M. Current smoking and reduced gray matter volume—a voxel-based morphometry study. *Neuropsychopharmacology*. 2014; 39:2594–600.  
<https://doi.org/10.1038/npp.2014.112>  
PMID:24832823
25. García-García I, Jurado MÁ, Garolera M, Segura B, Sala-Llloch R, Marqués-Iturria I, Pueyo R, Sender-Palacios MJ, Vernet-Vernet M, Narberhaus A, Ariza M, Junqué C. Alterations of the salience network in obesity: a resting-state fMRI study. *Hum Brain Mapp*. 2013; 34:2786–97.  
<https://doi.org/10.1002/hbm.22104>  
PMID:22522963
26. Tsopelas C, Stewart R, Savva GM, Brayne C, Ince P, Thomas A, Matthews FE, and Medical Research Council Cognitive Function and Ageing Study. Neuropathological correlates of late-life depression in older people. *Br J Psychiatry*. 2011; 198:109–14.  
<https://doi.org/10.1192/bjp.bp.110.078816>  
PMID:21282780
27. Richard E, Reitz C, Honig LH, Schupf N, Tang MX, Manly JJ, Mayeux R, Devanand D, Luchsinger JA. Late-life depression, mild cognitive impairment, and dementia. *JAMA Neurol*. 2013; 70:374–82.  
<https://doi.org/10.1001/jamaneurol.2013.603>  
PMID:23599941
28. Bangen KJ, Nation DA, Delano-Wood L, Weissberger GH, Hansen LA, Galasko DR, Salmon DP, Bondi MW. Aggregate effects of vascular risk factors on cerebrovascular changes in autopsy-confirmed alzheimer’s disease. *Alzheimers Dement*. 2015; 11:394–403.e1.  
<https://doi.org/10.1016/j.jalz.2013.12.025>  
PMID:25022538
29. Tchistiakova E, MacIntosh BJ, and Alzheimer’s Disease Neuroimaging Initiative. Summative effects of vascular risk factors on cortical thickness in mild cognitive impairment. *Neurobiol Aging*. 2016; 45:98–106.  
<https://doi.org/10.1016/j.neurobiolaging.2016.05.011>  
PMID:27459930
30. Cox SR, Lyall DM, Ritchie SJ, Bastin ME, Harris MA, Buchanan CR, Fawns-Ritchie C, Barbu MC, de Nooij L, Reus LM, Alloza C, Shen X, Neilson E, et al. Associations between vascular risk factors and brain MRI indices in UK biobank. *Eur Heart J*. 2019; 40:2290–300.  
<https://doi.org/10.1093/eurheartj/ehz100>  
PMID:30854560
31. Qiu C, von Strauss E, Bäckman L, Winblad B, Fratiglioni L. Twenty-year changes in dementia occurrence suggest decreasing incidence in central stockholm, Sweden. *Neurology*. 2013; 80:1888–94.  
<https://doi.org/10.1212/WNL.0b013e318292a2f9>  
PMID:23596063
32. Satizabal CL, Beiser AS, Chouraki V, Chêne G, Dufouil C, Seshadri S. Incidence of dementia over three decades in the framingham heart study. *N Engl J Med*. 2016; 374:523–32.  
<https://doi.org/10.1056/NEJMoa1504327>  
PMID:26863354
33. Schrijvers EM, Verhaaren BF, Koudstaal PJ, Hofman A, Ikram MA, Breteler MM. Is dementia incidence declining?: trends in dementia incidence since 1990 in the rotterdam study. *Neurology*. 2012; 78:1456–63.  
<https://doi.org/10.1212/WNL.0b013e3182553be6>  
PMID:22551732
34. Doblhammer G, Fink A, Fritze T. Short-term trends in dementia prevalence in Germany between the years 2007 and 2009. *Alzheimers Dement*. 2015; 11:291–99.  
<https://doi.org/10.1016/j.jalz.2014.02.006>  
PMID:25301681
35. Caamaño-Isorna F, Corral M, Montes-Martínez A, Takkouche B. Education and dementia: a meta-analytic study. *Neuroepidemiology*. 2006; 26:226–32.  
<https://doi.org/10.1159/000093378>  
PMID:16707907
36. Zhao E, Tranovich MJ, Wright VJ. The role of mobility as a protective factor of cognitive functioning in aging adults: a review. *Sports Health*. 2014; 6:63–69.  
<https://doi.org/10.1177/1941738113477832>  
PMID:24427444
37. Buscemi J, Steglitz J, Spring B. Factors and predictors of cognitive impairment in the elderly: a synopsis and comment on “systematic review: factors associated with risk for and possible prevention of cognitive decline in later life”. *Transl Behav Med*. 2012; 2:126–27.  
<https://doi.org/10.1007/s13142-012-0126-7>  
PMID:24073105
38. Oriol Torón PÁ, Badía Farré T, Romaguera Lliso A, Roda Diestro J. Metabolic syndrome and peripheral artery

- disease: two related conditions. *Endocrinol Nutr.* 2016; 63:258–64.  
<https://doi.org/10.1016/j.endonu.2016.03.007>  
PMID:[27165186](https://pubmed.ncbi.nlm.nih.gov/27165186/)
39. DeBette S, Seshadri S, Beiser A, Au R, Himali JJ, Palumbo C, Wolf PA, DeCarli C. Midlife vascular risk factor exposure accelerates structural brain aging and cognitive decline. *Neurology.* 2011; 77:461–68.  
<https://doi.org/10.1212/WNL.0b013e318227b227>  
PMID:[21810696](https://pubmed.ncbi.nlm.nih.gov/21810696/)
40. Novak V, Hajjar I. The relationship between blood pressure and cognitive function. *Nat Rev Cardiol.* 2010; 7:686–98.  
<https://doi.org/10.1038/nrcardio.2010.161>  
PMID:[20978471](https://pubmed.ncbi.nlm.nih.gov/20978471/)
41. Last D, Alsop DC, Abduljalil AM, Marquis RP, de Bazelaire C, Hu K, Cavallerano J, Novak V. Global and regional effects of type 2 diabetes on brain tissue volumes and cerebral vasoreactivity. *Diabetes Care.* 2007; 30:1193–9.  
<https://doi.org/10.2337/dc06-2052>  
PMID:[17290035](https://pubmed.ncbi.nlm.nih.gov/17290035/)
42. Suzuki H, Venkataraman AV, Bai W, Guitton F, Guo Y, Dehghan A, Matthews PM, and Alzheimer's Disease Neuroimaging Initiative. Associations of regional brain structural differences with aging, modifiable risk factors for dementia, and cognitive performance. *JAMA Netw Open.* 2019; 2:e1917257.  
<https://doi.org/10.1001/jamanetworkopen.2019.17257>  
PMID:[31825506](https://pubmed.ncbi.nlm.nih.gov/31825506/)
43. den Heijer T, Vermeer SE, van Dijk EJ, Prins ND, Koudstaal PJ, Hofman A, Breteler MM. Type 2 diabetes and atrophy of medial temporal lobe structures on brain MRI. *Diabetologia.* 2003; 46:1604–10.  
<https://doi.org/10.1007/s00125-003-1235-0>  
PMID:[14595538](https://pubmed.ncbi.nlm.nih.gov/14595538/)
44. Cherbuin N, Sachdev P, Anstey KJ. Higher normal fasting plasma glucose is associated with hippocampal atrophy: the PATH study. *Neurology.* 2012; 79:1019–26.  
<https://doi.org/10.1212/WNL.0b013e31826846de>  
PMID:[22946113](https://pubmed.ncbi.nlm.nih.gov/22946113/)
45. Sacuiu S, Insel PS, Mueller S, Tosun D, Mattsson N, Jack CR Jr, DeCarli C, Petersen R, Aisen PS, Weiner MW, Mackin RS, and Alzheimer's Disease Neuroimaging Initiative. Chronic depressive symptomatology in mild cognitive impairment is associated with frontal atrophy rate which hastens conversion to alzheimer dementia. *Am J Geriatr Psychiatry.* 2016; 24:126–35.  
<https://doi.org/10.1016/j.jagp.2015.03.006>  
PMID:[26238228](https://pubmed.ncbi.nlm.nih.gov/26238228/)
46. Jeon SY, Byun MS, Yi D, Lee JH, Choe YM, Ko K, Sohn BK, Choi HJ, Lee JY, Lee DY, and KBASE Research Group. Influence of hypertension on brain amyloid deposition and alzheimer's disease signature neurodegeneration. *Neurobiol Aging.* 2019; 75:62–70.  
<https://doi.org/10.1016/j.neurobiolaging.2018.11.001>  
PMID:[30553154](https://pubmed.ncbi.nlm.nih.gov/30553154/)
47. Clark LR, Kosciak RL, Allison SL, Berman SE, Norton D, Carlsson CM, Betthausen TJ, Bendlin BB, Christian BT, Chin NA, Asthana S, Johnson SC. Hypertension and obesity moderate the relationship between  $\beta$ -amyloid and cognitive decline in midlife. *Alzheimers Dement.* 2019; 15:418–28.  
<https://doi.org/10.1016/j.jalz.2018.09.008>  
PMID:[30367828](https://pubmed.ncbi.nlm.nih.gov/30367828/)
48. Callisaya ML, Beare R, Moran C, Phan T, Wang W, Srikanth VK. Type 2 diabetes mellitus, brain atrophy and cognitive decline in older people: a longitudinal study. *Diabetologia.* 2019; 62:448–58.  
<https://doi.org/10.1007/s00125-018-4778-9>  
PMID:[30547230](https://pubmed.ncbi.nlm.nih.gov/30547230/)
49. Pase MP, Davis-Plourde K, Himali JJ, Satizabal CL, Aparicio H, Seshadri S, Beiser AS, DeCarli C. Vascular risk at younger ages most strongly associates with current and future brain volume. *Neurology.* 2018; 91:e1479–86.  
<https://doi.org/10.1212/WNL.0000000000006360>  
PMID:[30232248](https://pubmed.ncbi.nlm.nih.gov/30232248/)
50. Villeneuve S, Reed BR, Madison CM, Wirth M, Marchant NL, Kriger S, Mack WJ, Sanossian N, DeCarli C, Chui HC, Weiner MW, Jagust WJ. Vascular risk and A $\beta$  interact to reduce cortical thickness in AD vulnerable brain regions. *Neurology.* 2014; 83:40–7.  
<https://doi.org/10.1212/WNL.0000000000000550>  
PMID:[24907234](https://pubmed.ncbi.nlm.nih.gov/24907234/)
51. Jones DT, Knopman DS, Gunter JL, Graff-Radford J, Vemuri P, Boeve BF, Petersen RC, Weiner MW, Jack CR Jr, and Alzheimer's Disease Neuroimaging Initiative. Cascading network failure across the alzheimer's disease spectrum. *Brain.* 2016; 139:547–62.  
<https://doi.org/10.1093/brain/awv338>  
PMID:[26586695](https://pubmed.ncbi.nlm.nih.gov/26586695/)
52. Buckner RL, Sepulcre J, Talukdar T, Krienen FM, Liu H, Hedden T, Andrews-Hanna JR, Sperling RA, Johnson KA. Cortical hubs revealed by intrinsic functional connectivity: mapping, assessment of stability, and relation to alzheimer's disease. *J Neurosci.* 2009; 29:1860–73.  
<https://doi.org/10.1523/JNEUROSCI.5062-08.2009>  
PMID:[19211893](https://pubmed.ncbi.nlm.nih.gov/19211893/)
53. Jones DT, Graff-Radford J, Lowe VJ, Wiste HJ, Gunter JL, Senjem ML, Botha H, Kantarci K, Boeve BF, Knopman DS, Petersen RC, Jack CR Jr. Tau, amyloid, and cascading network failure across the alzheimer's disease spectrum. *Cortex.* 2017; 97:143–59.

- <https://doi.org/10.1016/j.cortex.2017.09.018>  
PMID:[29102243](https://pubmed.ncbi.nlm.nih.gov/29102243/)
54. Alosco ML, Brickman AM, Spitznagel MB, Narkhede A, Griffith EY, Raz N, Cohen R, Sweet LH, Colbert LH, Josephson R, Hughes J, Rosneck J, Gunstad J. Higher BMI is associated with reduced brain volume in heart failure. *BMC Obes.* 2014; 1:4.  
<https://doi.org/10.1186/2052-9538-1-4>  
PMID:[25984353](https://pubmed.ncbi.nlm.nih.gov/25984353/)
55. Sierra C. Hypertension and the risk of dementia. *Front Cardiovasc Med.* 2020; 7:5.  
<https://doi.org/10.3389/fcvm.2020.00005>  
PMID:[32083095](https://pubmed.ncbi.nlm.nih.gov/32083095/)
56. Convit A. Links between cognitive impairment in insulin resistance: an explanatory model. *Neurobiol Aging.* 2005 (Suppl 1); 26:31–35.  
<https://doi.org/10.1016/j.neurobiolaging.2005.09.018>  
PMID:[16246463](https://pubmed.ncbi.nlm.nih.gov/16246463/)
57. Dągtyć G, Den Boer JA, Trentani A. The cholinergic system and depression. *Behav Brain Res.* 2011; 221:574–82.  
<https://doi.org/10.1016/j.bbr.2010.02.023>  
PMID:[20170685](https://pubmed.ncbi.nlm.nih.gov/20170685/)
58. Zlokovic BV. Neurovascular pathways to neurodegeneration in alzheimer's disease and other disorders. *Nat Rev Neurosci.* 2011; 12:723–38.  
<https://doi.org/10.1038/nrn3114>  
PMID:[22048062](https://pubmed.ncbi.nlm.nih.gov/22048062/)
59. Corlier F, Hafzalla G, Faskowitz J, Kuller LH, Becker JT, Lopez OL, Thompson PM, Braskie MN. Systemic inflammation as a predictor of brain aging: contributions of physical activity, metabolic risk, and genetic risk. *Neuroimage.* 2018; 172:118–29.  
<https://doi.org/10.1016/j.neuroimage.2017.12.027>  
PMID:[29357308](https://pubmed.ncbi.nlm.nih.gov/29357308/)
60. Heneka MT, Carson MJ, El Khoury J, Landreth GE, Brosseron F, Feinstein DL, Jacobs AH, Wyss-Coray T, Vitorica J, Ransohoff RM, Herrup K, Frautschy SA, Finsen B, et al. Neuroinflammation in alzheimer's disease. *Lancet Neurol.* 2015; 14:388–405.  
[https://doi.org/10.1016/S1474-4422\(15\)70016-5](https://doi.org/10.1016/S1474-4422(15)70016-5)  
PMID:[25792098](https://pubmed.ncbi.nlm.nih.gov/25792098/)
61. Bussian TJ, Aziz A, Meyer CF, Swenson BL, van Deursen JM, Baker DJ. Clearance of senescent glial cells prevents tau-dependent pathology and cognitive decline. *Nature.* 2018; 562:578–82.  
<https://doi.org/10.1038/s41586-018-0543-y>  
PMID:[30232451](https://pubmed.ncbi.nlm.nih.gov/30232451/)
62. Heneka MT, Kummer MP, Latz E. Innate immune activation in neurodegenerative disease. *Nat Rev Immunol.* 2014; 14:463–77.  
<https://doi.org/10.1038/nri3705> PMID:[24962261](https://pubmed.ncbi.nlm.nih.gov/24962261/)
63. Hopperton KE, Mohammad D, Trépanier MO, Giuliano V, Bazinet RP. Markers of microglia in post-mortem brain samples from patients with alzheimer's disease: a systematic review. *Mol Psychiatry.* 2018; 23:177–98.  
<https://doi.org/10.1038/mp.2017.246>  
PMID:[29230021](https://pubmed.ncbi.nlm.nih.gov/29230021/)
64. Arranz AM, De Strooper B. The role of astroglia in alzheimer's disease: pathophysiology and clinical implications. *Lancet Neurol.* 2019; 18:406–14.  
[https://doi.org/10.1016/S1474-4422\(18\)30490-3](https://doi.org/10.1016/S1474-4422(18)30490-3)  
PMID:[30795987](https://pubmed.ncbi.nlm.nih.gov/30795987/)
65. Shi Y, Holtzman DM. Interplay between innate immunity and alzheimer disease: APOE and TREM2 in the spotlight. *Nat Rev Immunol.* 2018; 18:759–72.  
<https://doi.org/10.1038/s41577-018-0051-1>  
PMID:[30140051](https://pubmed.ncbi.nlm.nih.gov/30140051/)
66. Su F, Bai F, Zhang Z. Inflammatory cytokines and alzheimer's disease: a review from the perspective of genetic polymorphisms. *Neurosci Bull.* 2016; 32:469–80.  
<https://doi.org/10.1007/s12264-016-0055-4>  
PMID:[27568024](https://pubmed.ncbi.nlm.nih.gov/27568024/)
67. Wassenaar TM, Yaffe K, van der Werf YD, Sexton CE. Associations between modifiable risk factors and white matter of the aging brain: insights from diffusion tensor imaging studies. *Neurobiol Aging.* 2019; 80: 56–70.  
<https://doi.org/10.1016/j.neurobiolaging.2019.04.006>  
PMID:[31103633](https://pubmed.ncbi.nlm.nih.gov/31103633/)
68. Mueller SG, Weiner MW, Thal LJ, Petersen RC, Jack CR, Jagust W, Trojanowski JQ, Toga AW, Beckett L. Ways toward an early diagnosis in alzheimer's disease: the alzheimer's disease neuroimaging initiative (ADNI). *Alzheimers Dement.* 2005; 1:55–66.  
<https://doi.org/10.1016/j.jalz.2005.06.003>  
PMID:[17476317](https://pubmed.ncbi.nlm.nih.gov/17476317/)
69. Firbank MJ, Blamire AM, Krishnan MS, Teodorczuk A, English P, Gholkar A, Harrison R, O'Brien JT. Atrophy is associated with posterior cingulate white matter disruption in dementia with lewy bodies and alzheimer's disease. *Neuroimage.* 2007; 36:1–7.  
<https://doi.org/10.1016/j.neuroimage.2007.02.027>  
PMID:[17412610](https://pubmed.ncbi.nlm.nih.gov/17412610/)
70. Harrison LM, Penny W, Ashburner J, Trujillo-Barreto N, Friston KJ. Diffusion-based spatial priors for imaging. *Neuroimage.* 2007; 38:677–95.  
<https://doi.org/10.1016/j.neuroimage.2007.07.032>  
PMID:[17869542](https://pubmed.ncbi.nlm.nih.gov/17869542/)
71. Xie C, Goveas J, Wu Z, Li W, Chen G, Franczak M, Antuono PG, Jones JL, Zhang Z, Li SJ. Neural basis of the association between depressive symptoms and

- memory deficits in nondemented subjects: resting-state fMRI study. *Hum Brain Mapp.* 2012; 33:1352–63.  
<https://doi.org/10.1002/hbm.21291>  
PMID:[21618660](https://pubmed.ncbi.nlm.nih.gov/21618660/)
72. Xie C, Bai F, Yu H, Shi Y, Yuan Y, Chen G, Li W, Chen G, Zhang Z, Li SJ. Abnormal insula functional network is associated with episodic memory decline in amnesic mild cognitive impairment. *Neuroimage.* 2012; 63:320–27.  
<https://doi.org/10.1016/j.neuroimage.2012.06.062>  
PMID:[22776459](https://pubmed.ncbi.nlm.nih.gov/22776459/)
73. Baron RM, Kenny DA. The moderator-mediator variable distinction in social psychological research: conceptual, strategic, and statistical considerations. *J Pers Soc Psychol.* 1986; 51:1173–82.  
<https://doi.org/10.1037//0022-3514.51.6.1173>  
PMID:[3806354](https://pubmed.ncbi.nlm.nih.gov/3806354/)
74. Sobel ME. Asymptotic Confidence Intervals For Indirect Effects In Structural Equation Models. *Sociological Methodology.* 1982; 13:290–312.  
<https://doi.org/10.2307/270723>
75. Preacher KJ, Hayes AF. SPSS and SAS procedures for estimating indirect effects in simple mediation models. *Behav Res Methods Instrum Comput.* 2004; 36:717–31.  
<https://doi.org/10.3758/bf03206553>  
PMID:[15641418](https://pubmed.ncbi.nlm.nih.gov/15641418/)

SUPPLEMENTARY MATERIALS

Supplementary Figures



**Supplementary Figure 1. Multivariate regression analysis revealed the significant effects of single vascular risk factor on gray matter volumes across all subjects (whole brain correction with sex, age and APOE ε4 genotype (AlphaSim correction,  $p < 0.05$ , Cluster size =  $3432\text{mm}^3$ )).** Brain regions represented the significant effects of diabetes (A), hypertension (B), smoking (C), depression (D), obesity (E) and low education (F) on the GMV after controlling the effects of covariates including age, gender, APOEε4 genotype and group. Blue color indicates negative correlation between VRF scores and GMV in the AD spectrum. Color bar is presented with z scores. Abbreviation: LTPJ, left temporoparietal junction; LFFA, left fusiform face area; RvmPFC, right ventromedial prefrontal cortex; RFFA, right fusiform face area; LIPC, left inferior parietal cortex; LANG, left angular gyrus; LPCUN, left precuneus; RCUN, right cuneus; RDLPFC, right dorsolateral prefrontal cortex; RPCUN, right precuneus; LIOG, left inferior occipital gyrus; LPoCG, left postcentral gyrus; LCUN, left cuneus.



**Supplementary Figure 2. Main effects of disease on the gray matter volumes across all subjects.** (A) Brain regions with altered gray matter volumes were primarily located in the bTTPJ, bFFA, bDMPFC, bvmPFC, LDLPFC, LPCUN, LPCC, LHip and RDLPFC, RPCUN, RPCC, RHip. Blue color indicates decreased gray matter volumes in the AD spectrum, color bar presents with z scores. (B) Numerical representation of the gradually decreased gray matter volumes in the target regions (LPCC:  $F_{(3, 188)}=27.61$ ,  $p<0.000$ ; RPCC:  $F_{(3, 188)}=19.98$ ,  $p<0.000$ ; LHip:  $F_{(3, 188)}=26.62$ ,  $p<0.000$  and RHip:  $F_{(3, 188)}=20.65$ ,  $p<0.000$ ) in the CN group (blue color), the EMCI group (green color), the LMCI group (purple color) and the AD group (red color). Abbreviation: bTTPJ, bilateral temporoparietal junction; bFFA, bilateral fusiform face area; bDMPFC, bilateral dorsomedial prefrontal cortex; bvmPFC, bilateral ventromedial prefrontal cortex; RDLPFC, right dorsolateral prefrontal cortex; RPCC, right posterior cingulate cortex; RPCUN, right precuneus; RHip, right hippocampus; LHip, left hippocampus; LPCC, left posterior cingulate cortex; LPCUN, left precuneus; LDLPFC, left dorsolateral prefrontal cortex; CN, cognitively normal; EMCI, early mild cognitive impairment; LMCI, late mild cognitive impairment; AD, Alzheimer's disease; GMV, gray matter volume.



**Supplementary Figure 3.** Gray matter volumes were compared between CN group and EMCI group (A), CN group and LMCI group (B), and CN group and AD group (C). Blue color indicates decreased gray matter volumes in EMCI, LMCI and AD patients compared to CN subjects. Color bar presents with z scores. Abbreviation: LPoCG, left postcentral gyrus; LTPJ, left temporoparietal junction; RIFG, right frontal gyrus; LpMTG, left posterior middle temporal gyrus; Lins, left insular; RHip, right hippocampus; LHip, left hippocampus; RDMTGF, right dorsomedial prefrontal cortex; bTTPJ, bilateral temporoparietal junction; bFFA, bilateral fusiform face area; bDMPFC, bilateral dorsomedial prefrontal cortex; bvmPFC, bilateral ventromedial prefrontal cortex; LMTG, left middle temporal gyrus; RMTG, right middle temporal gyrus; CN, cognitively normal; EMCI, early mild cognitive impairment; LMCI, late mild cognitive impairment; AD, Alzheimer's disease.



**Supplementary Figure 4. Multivariate regression analysis revealed the significant effects of gray matter volumes on the MMSE and ADAS-Cog scores across all subject.** (A) Brain regions represented the significant effects of gray matter volumes on the MMSE in the AD spectrum. Bright color indicates positive correlation between gray matter volumes and MMSE scores. Color bar presents with z scores. (B) Representative illustration of the relationship between gray matter volumes and MMSE scores. (C) Brain regions represented the significant effects of gray matter volumes on the ADAS-Cog scores in the AD spectrum. Blue color indicates negative correlation between gray matter volumes and ADAS-Cog scores. Color bar presents with z scores. D: Representative illustration of the relationship between gray matter volumes and ADAS-Cog scores. Abbreviation: LIPC, left inferior parietal cortex; LDLPFC, left dorsolateral prefrontal cortex; bTPJ, bilateral temporoparietal junction; LvlPFC, left ventrolateral prefrontal cortex; LPCC, left posterior cingulate cortex; RPCC, right posterior cingulate cortex; LHip/PHG, left hippocampus/ parahippocampal gyrus; LFFA, left fusiform face area; RFFA, right fusiform face area; LvmPFC, left ventromedial prefrontal cortex; bIPC, bilateral inferior parietal cortex; bMTG, bilateral medial temporal gyrus; bvmPFC, bilateral ventromedial prefrontal cortex; LPCUN, left precuneus; RPCUN, right precuneus; RHip/PHG, right hippocampus/ parahippocampal gyrus; MMSE, Mini-Mental State Examination; ADAS-Cog, Alzheimer's Disease Assessment Scale-Cognitive Subscale; CN, cognitively normal; EMCI, early mild cognitive impairment; LMCI, late mild cognitive impairment; AD, Alzheimer's disease; GMV, gray matter volume.



**Supplementary Figure 5. Schematic of the proposed model on the mechanisms how VRFs affect cortical atrophy and cognitive decline in the AD spectrum.** Single vascular risk factor act on the normal brain, leading to cognitive decline in patients. Vascular risk factors may cause chronic neuroinflammation, which in turn promotes A $\beta$  deposition and hyperphosphorylation of the tau protein, ultimately leading to brain atrophy.
